# Supplementary material for: Models for the binding channel of wild type and mutant transthyretin with glabridin
Source: Royal Society of Chemistry journal article supplement (doi:10.1039/c6ra19814g), 2016-01-01
Supplement: c6ra19814g1.pdf [file c6ra19814g1.pdf]

**Fig. S1** The  $\beta$ -strands are named from A to H. The F and H strands are located in the other monomer of the same dimer. Arrows point from the hydrogen bond donor to the acceptor. The  $\alpha$ -helix is from Asp 74 to Ala 81.

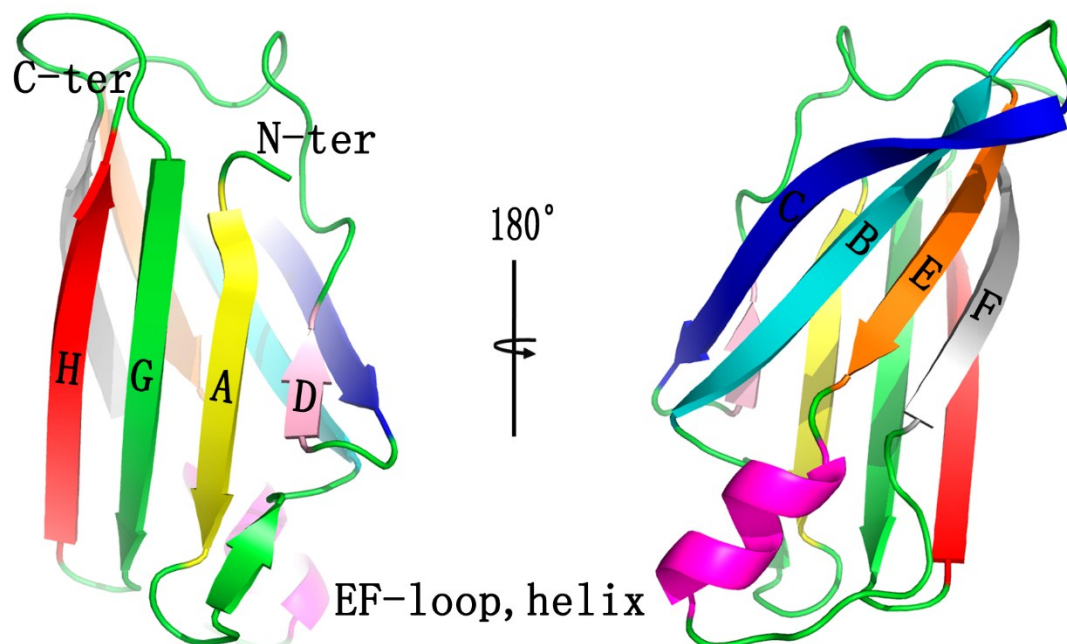

**Fig. s2** a The 2D structure of Glab. b the 3D structure of Glab. c The potential surface energy of Glab. d The hydrophobicity of Glab.

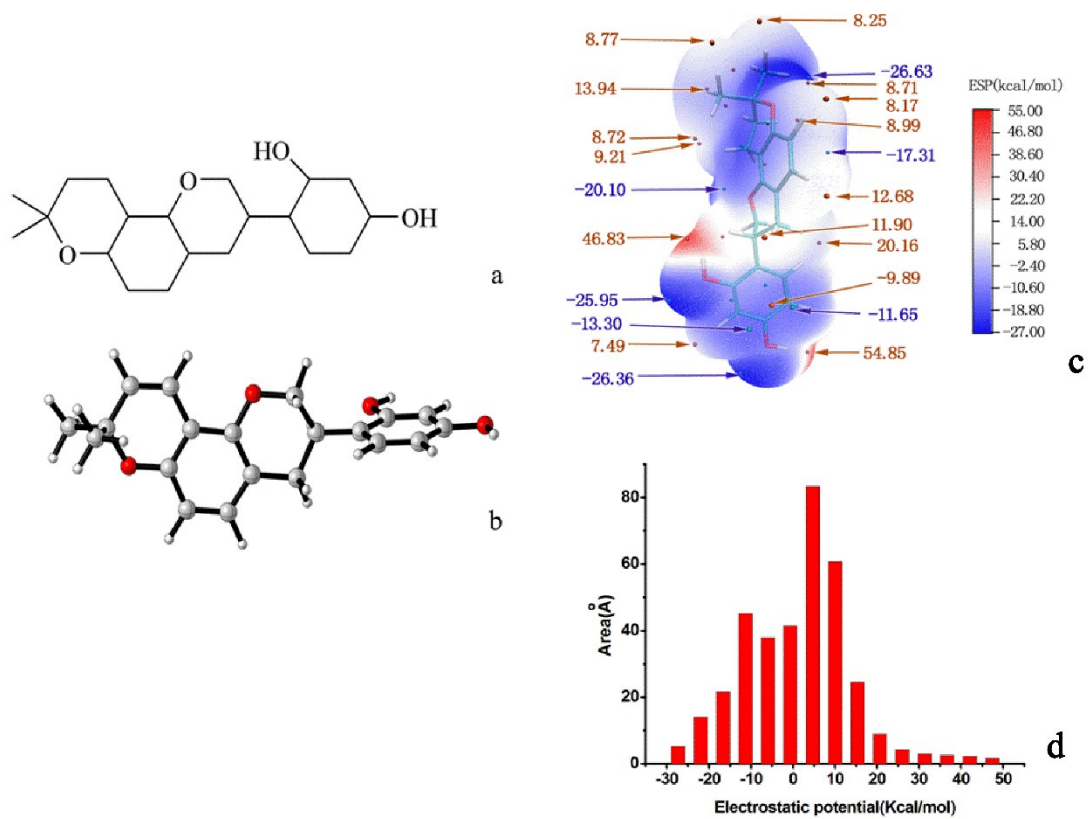

**Fig. s3** The RMSD plot of WT and V30A during 20 ns MD simulations.

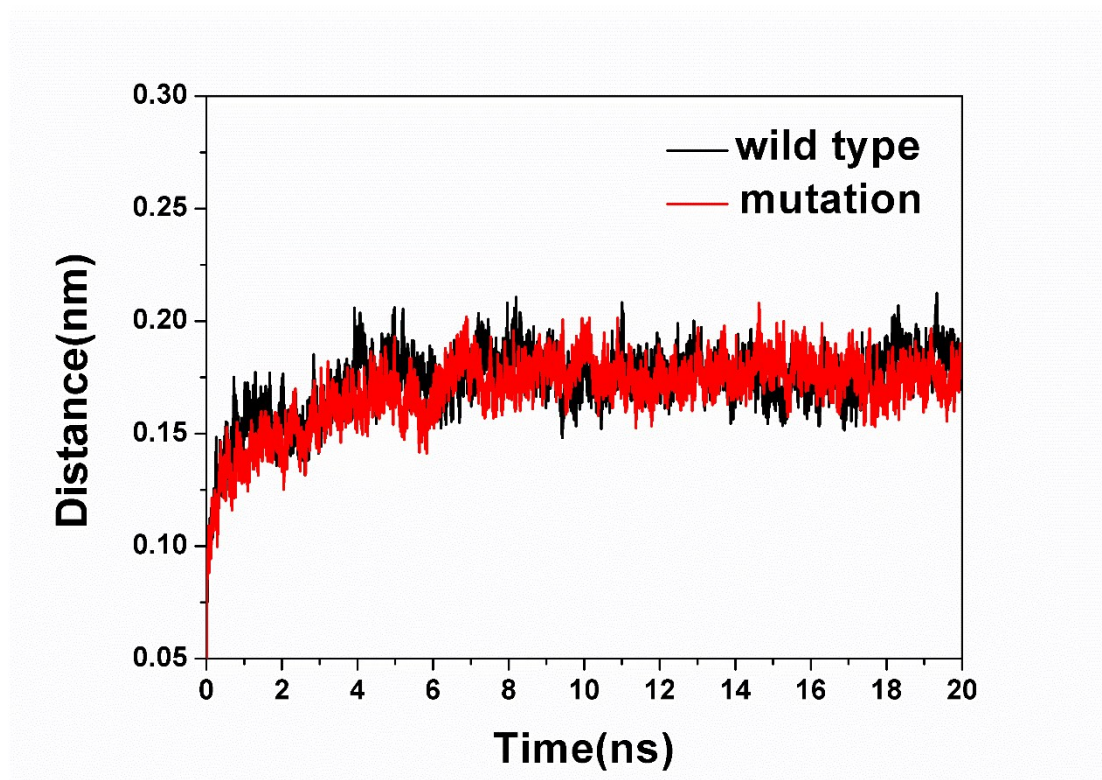

**Fig. s4** a The important residues in the TTR channel. b Geometry of the channel in the sample snapshot calculated by CAVER 3.0 of the WT TTR. c Geometry of the channel in the sample snapshot calculated by CAVER 3.0 of the V30A TTR.

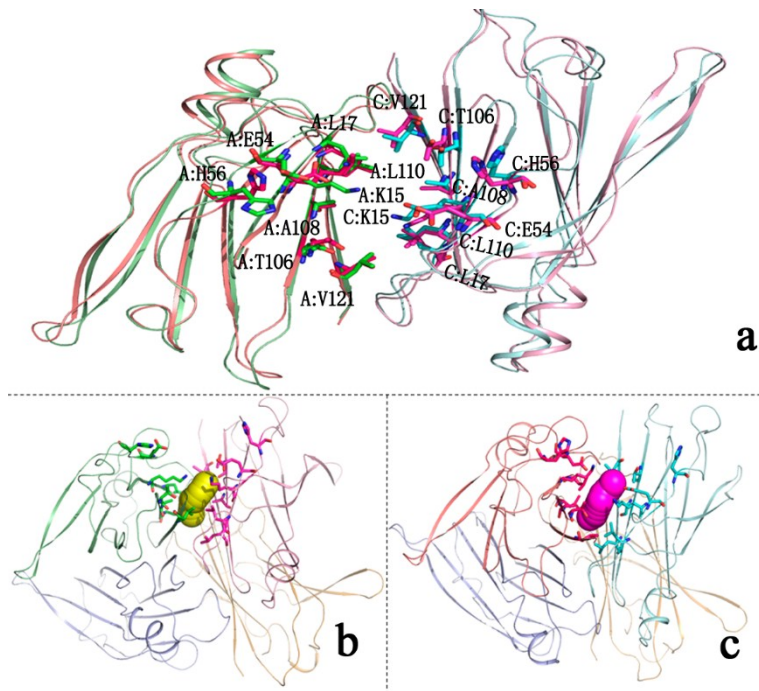

**Fig. s5** The change of secondary structure of AB loop and CD loop

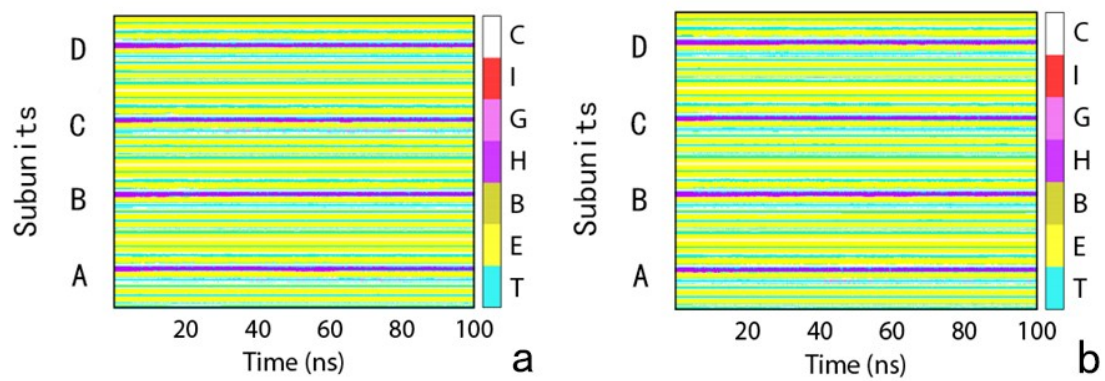

**Fig. s6** The relative free energy surfaces along the first two principle components (PC-1, PC-2) of a TTR-Glab in A chain; b TTR-Glab in B chain; c TTR-Glab in C chain; d TTR-Glab in D chain; e V30A TTR-Glab in A chain; f V30A TTR-Glab in B chain; g V30A TTR-Glab in C chain; h V30A TTR-Glab in D chain.

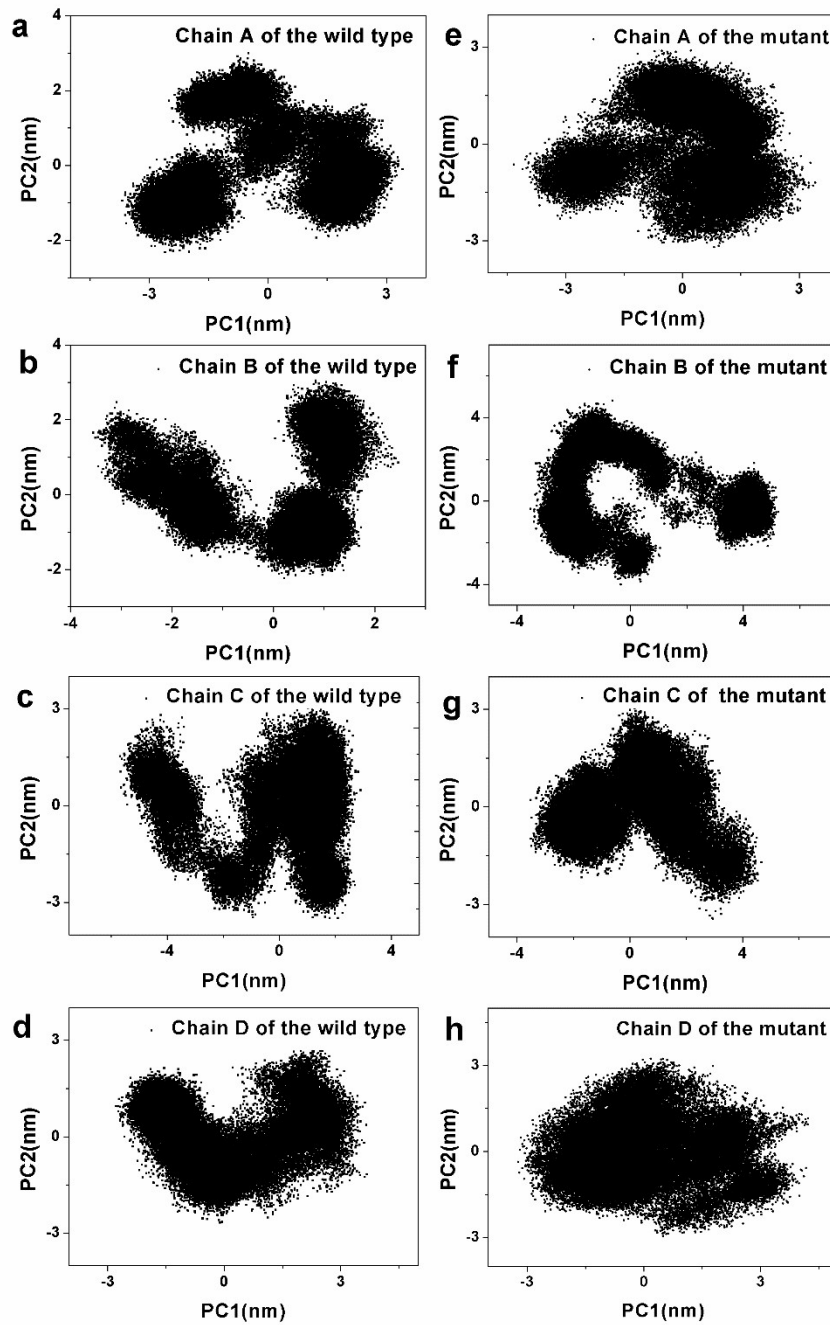

**Fig. s7** The Turbidity of WT TTR and V30A TTR in different pH.

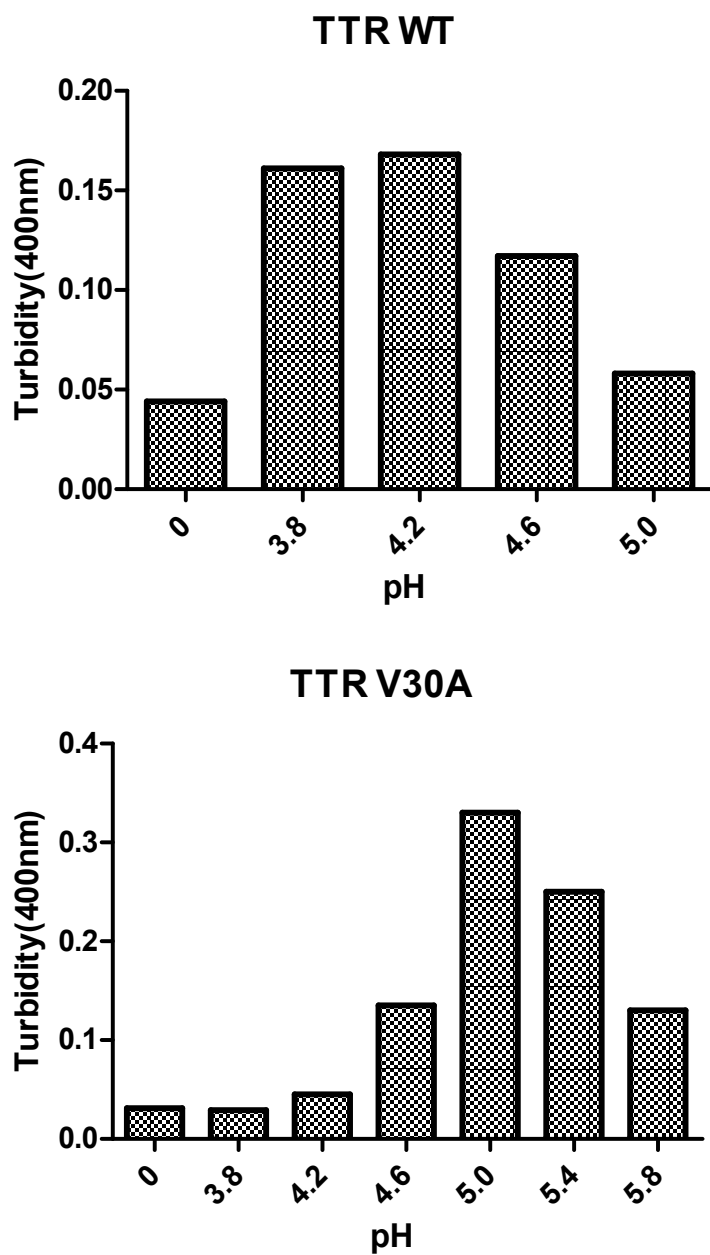

Table s1. Molecular Systems.

| <b>Simulations</b>                       | <b>Time(ns)</b> | <b>Solvent</b> | <b>Ions</b>       |
|------------------------------------------|-----------------|----------------|-------------------|
| WT-Glab1 (between chain A and chain C)   | 100             | 19253          | 20Na <sup>+</sup> |
| WT-Glab2+Glab1                           | 100             | 19307          | 20Na <sup>+</sup> |
| V30A-Glab1 (between chain A and chain C) | 100             | 19259          | 20Na <sup>+</sup> |
| V30A-Glab 2+Glab1                        | 100             | 19313          | 20Na <sup>+</sup> |
| WT                                       | 20              | 19225          | 20Na <sup>+</sup> |
| V30A                                     | 20              | 19217          | 20Na <sup>+</sup> |
